# Supplementary material for: A Classification Approach for Cancer Survivors from Those Cancer-Free, Based on Health Behaviors: Analysis of the Lifelines Cohort
Source: MDPI journal article supplement (doi:10.3390/cancers13102335), 2021-05-12

Supplementary file 1. Heat map of the consistency on feature importance in the random forest classifier by the MDG for every subset, a more saturated colour means a more important feature in the analysis. The heat maps show the consistency when including all features (a), when including only health-risk behaviours (b), and in the case-control analysis (c).

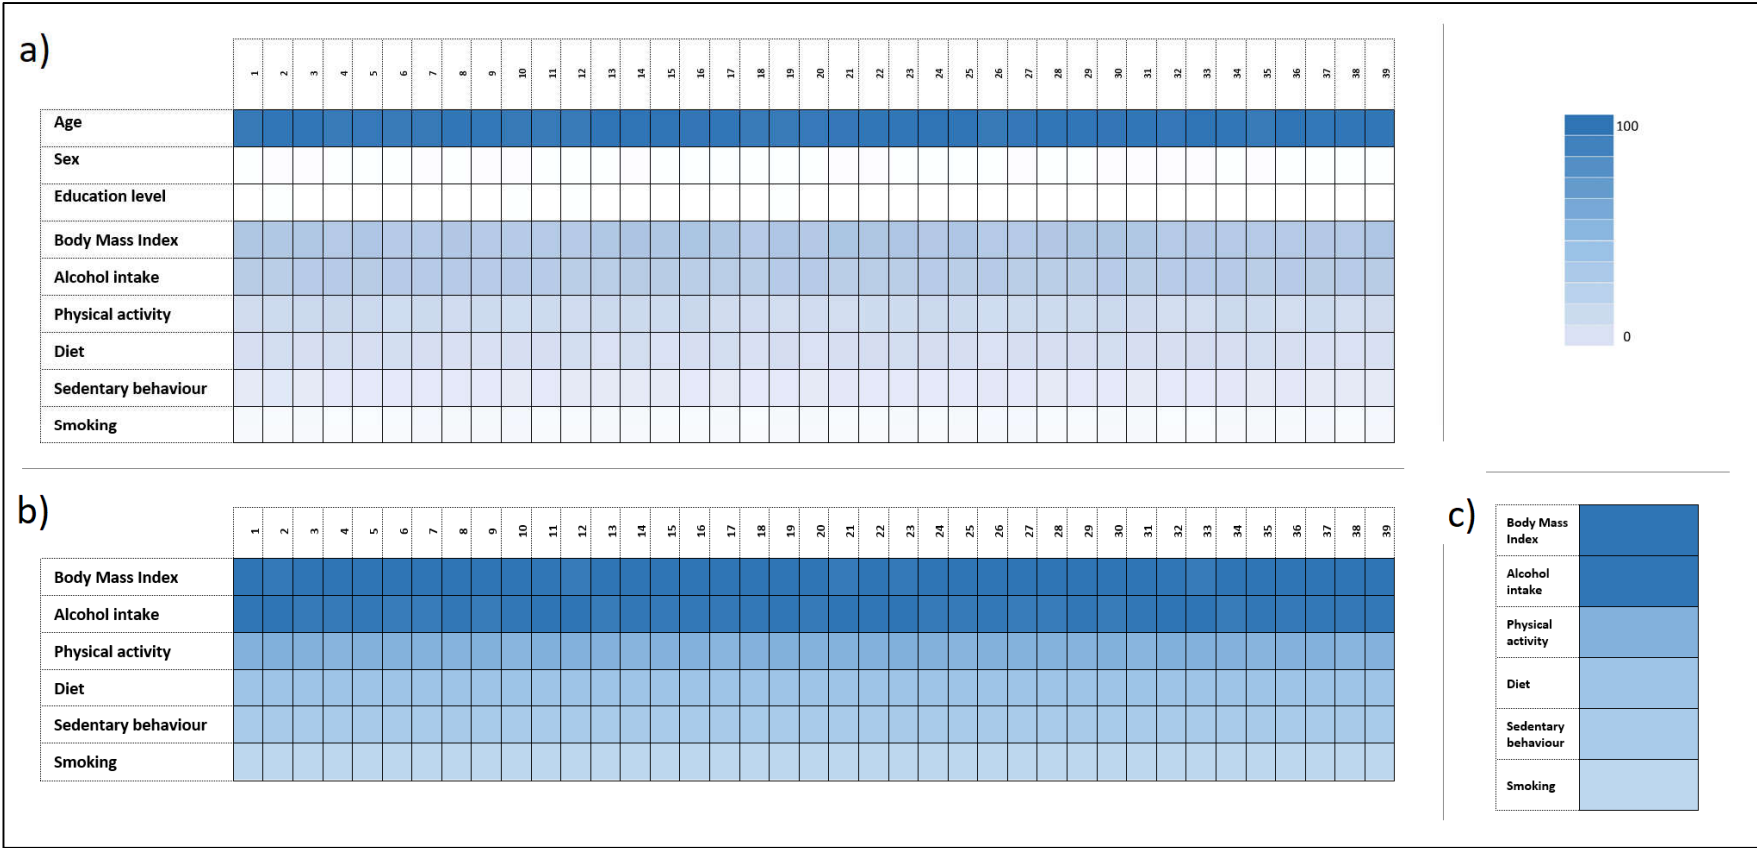

Supplement: s1 [file s1]
